# Supplementary material
Source: publisher figshare collection journal article supplement (https://tandf.figshare.com/articles/dataset/_/12848850)
Supplement: Supplementary file 1 [file 1]

**Table A1.** Representative time histories for each case history

| No. | Case history<br>Location     | Earthquake<br>events    | Time history | PGA (g) | Distance from<br>the case history<br>(km) | NEHRP site<br>classification<br>(Chiou et al.<br>2008) |
|-----|------------------------------|-------------------------|--------------|---------|-------------------------------------------|--------------------------------------------------------|
| 1   | Juvenile Hall                | 1971 San Fernando       | PAS-000      | 0.088   | 38.67                                     | D                                                      |
|     |                              |                         | PAS-090      | 0.110   |                                           |                                                        |
|     |                              |                         | PDL-120      | 0.121   | 44.74                                     | D                                                      |
|     |                              |                         | PDL-210      | 0.151   |                                           |                                                        |
| 2   | Heber Road                   | 1979 Imperial Valley    | BCR-140      | 0.588   | 7.40                                      | D                                                      |
|     |                              |                         | BCR-230      | 0.775   |                                           |                                                        |
|     |                              |                         | AGR-003      | 0.370   | 15.67                                     | D                                                      |
|     |                              |                         | SHP-270      | 0.506   | 13.44                                     | C                                                      |
| 3   | Whiskey springs fan          | 1983 Borah Peaks        | BOR-000      | 0.055   | 8.26                                      | C                                                      |
|     |                              |                         | BOR-090      | 0.073   |                                           |                                                        |
| 4   | Wildlife site                | 1987 Superstition Hills | IVW-090      | 0.177   | 0                                         | D                                                      |
|     |                              |                         | WSM-090      | 0.172   | 10.87                                     | D                                                      |
|     |                              |                         | WSM-180      | 0.211   |                                           |                                                        |
| 5   | Moss Landing<br>MBARI Bldg 4 | 1989 Loma Prieta        | GOF-160      | 0.284   | 30.15                                     | D                                                      |
|     |                              |                         | GOF-250      | 0.241   |                                           |                                                        |
|     |                              |                         | HCH-090      | 0.247   | 34.80                                     | D                                                      |
|     |                              |                         | HCH-180      | 0.215   |                                           |                                                        |

|   |                               |                  |         |       |       |   |
|---|-------------------------------|------------------|---------|-------|-------|---|
| 6 | Moss Landing<br>MBARI Bldg. 3 | 1989 Loma Prieta | HDA-165 | 0.269 | 34.72 | D |
|   |                               |                  | HDA-255 | 0.279 |       |   |
|   |                               |                  | GOF-160 | 0.284 | 30.15 | D |
|   |                               |                  | GOF-250 | 0.241 |       |   |
|   |                               |                  | HCH-090 | 0.247 | 34.80 | D |
|   |                               |                  | HCH-180 | 0.215 |       |   |
| 7 | Moss Landing<br>MLML Bldg     | 1989 Loma Prieta | HDA-165 | 0.269 | 34.72 | D |
|   |                               |                  | HDA-255 | 0.279 |       |   |
|   |                               |                  | AND-250 | 0.244 | 43.17 | D |
|   |                               |                  | AND-340 | 0.240 |       |   |
|   |                               |                  | G02-000 | 0.367 | 29.00 | D |
|   |                               |                  | GO2-090 | 0.322 |       |   |
| 8 | Moss Landing<br>MLML Bldg     | 1989 Loma Prieta | HCH-090 | 0.247 | 34.92 | D |
|   |                               |                  | HCH-180 | 0.215 |       |   |
|   |                               |                  | AND-250 | 0.244 | 43.17 | D |
|   |                               |                  | AND-340 | 0.240 |       |   |
|   |                               |                  | G02-000 | 0.367 | 29.00 | D |
|   |                               |                  | GO2-090 | 0.322 |       |   |
| 9 | Leonardini Farm               | 1989 Loma Prieta | HCH-090 | 0.247 | 34.92 | D |
|   |                               |                  | HCH-180 | 0.215 |       |   |
|   |                               |                  | G02-000 | 0.367 | 34.16 | D |
|   |                               |                  |         |       |       |   |

|    |                      |                      |            |       |       |   |
|----|----------------------|----------------------|------------|-------|-------|---|
|    |                      |                      | G02-090    | 0.322 |       |   |
|    |                      |                      | HCH-090    | 0.247 | 36.32 | D |
|    |                      |                      | HCH-180    | 0.215 |       |   |
| 10 | Treasure Island      | 1989 Loma Prieta     | TRI-000    | 0.10  | 0.813 | E |
|    |                      |                      | TRI-090    | 0.159 |       |   |
| 11 | Rudbaneh Town canal  | 1990 Manjil, Iran    | 188040     | 0.097 | 29.06 | D |
|    |                      |                      | 188310     | 0.086 |       |   |
| 12 | Balboa Blvd          | 1994 Northridge      | PAR-L      | 0.657 | 4.01  | D |
|    |                      |                      | PAR-T      | 0.406 |       |   |
|    |                      |                      | SYL-090    | 0.604 | 7.34  | D |
|    |                      |                      | SYL-360    | 0.843 |       |   |
| 13 | Wynne Ave.           | 1994 Northridge      | CNP-106    | 0.358 | 7.01  | D |
|    |                      |                      | CNP-196    | 0.392 |       |   |
|    |                      |                      | SCE-288    | 0.493 | 11.44 | D |
|    |                      |                      | STC-090    | 0.368 | 2.11  | D |
|    |                      |                      | STC-180    | 0.477 |       |   |
| 14 | Wufeng Site C (A-A') | 1999 Chi-Chi, Taiwan | TCU065-000 | 0.603 | 0.80  | D |
|    |                      |                      | TCU065-090 | 0.814 |       |   |
| 15 | Wufeng Site C (B-B') | 1999 Chi-Chi, Taiwan | TCU065-000 | 0.603 | 0.80  | D |
|    |                      |                      | TCU065-090 | 0.814 |       |   |
| 16 | Wufeng Site C1       | 1999 Chi-Chi, Taiwan | TCU065-000 | 0.603 | 0.801 | D |

|    |                |                      |            |       |       |   |
|----|----------------|----------------------|------------|-------|-------|---|
|    |                |                      | TCU065-090 | 0.814 |       |   |
| 17 | Wufeng Site B  | 1999 Chi-Chi, Taiwan | TCU065-000 | 0.603 | 0.96  | D |
|    |                |                      | TCU065-090 | 0.814 |       |   |
| 18 | Wufeng Site M  | 1999 Chi-Chi, Taiwan | TCU065-000 | 0.603 | 0.73  | D |
|    |                |                      | TCU065-090 | 0.814 |       |   |
| 19 | Nantou Site N  | 1999 Chi-Chi, Taiwan | TCU076-000 | 0.416 | 1.97  | D |
|    |                |                      | TCU076-090 | 0.303 |       |   |
| 20 | Hotel Sapanca  | 1999 Kocaeli, Turkey | YPT-060    | 0.268 | 43.15 | D |
|    |                |                      | YPT-330    | 0.349 |       |   |
| 21 | Police Station | 1999 Kocaeli, Turkey | YPT-060    | 0.268 | 15.68 | D |
|    |                |                      | YPT-330    | 0.349 |       |   |
| 22 | Soccer Field   | 1999 Kocaeli, Turkey | YPT-060    | 0.268 | 14.95 | D |
|    |                |                      | YPT-330    | 0.349 |       |   |
| 23 | Yalova Harbor  | 1999 Kocaeli, Turkey | YPT-060    | 0.268 | 43.10 | D |
|    |                |                      | YPT-330    | 0.349 |       |   |

---
