# Supplementary material
Source: publisher figshare collection journal article supplement (https://tandf.figshare.com/articles/dataset/_/12848850)
Supplement: Supplementary file 2 [file 1]

**Table A2.** Summarization of undrained shear strength, sliding depth, strong motions

| Case No. | Site location       | $(N_1)_{60}$ | $F_c$ | $\Delta N$ | $(N_1)_{60-cs}$ | Undrained shear strength (kPa) |                        |                          | Depth of sliding (m) | Vertical effective stress (kPa) | The yield acceleration (g)  |                        |                          |
|----------|---------------------|--------------|-------|------------|-----------------|--------------------------------|------------------------|--------------------------|----------------------|---------------------------------|-----------------------------|------------------------|--------------------------|
|          |                     |              |       |            |                 | Idriss and Boulanger (2015)    | Kramer and Wang (2015) | Olson and Johnson (2008) |                      |                                 | Idriss and Boulanger (2015) | Kramer and Wang (2015) | Olson and Johnson (2008) |
| 1        | Juvenile hall       | 6.9          | 35%   | 2.8        | 9.7             | 8.25                           | 8.02                   | 7.04                     | 6.39                 | 85.86                           | 0.08                        | 0.076                  | 0.072                    |
| 2        | Heber Road          | 1.0          | 20%   | 1.67       | 2.7             | 2.85                           | 3.69                   | 2.32                     | 5.21                 | 61.97                           | 0.006                       | 0.021                  | 0.004                    |
| 3        | Whiskey Springs     | 13.0         | 22%   | 1.8        | 14.8            | 22.22                          | 16.78                  | 13.69                    | 5.78                 | 107.41                          | 0.16                        | 0.095                  | 0.07                     |
| 4        | Wildlife Site       | 10.3         | 30%   | 2.4        | 12.7            | 6.76                           | 9.52                   | 6.61                     | 4.95                 | 61.65                           | 0.03                        | 0.07                   | 0.028                    |
| 5        | Moss Landing Bldg4  | 10.0         | 5%    | 0.5        | 10.5            | 6.66                           | 9.39                   | 6.69                     | 5.15                 | 63.73                           | 0.007                       | 0.08                   | 0.007                    |
| 6        | Moss Landing Bldg3  | 10.0         | 1%    | 0.1        | 10.1            | 8.40                           | 10.84                  | 8.82                     | 8.41                 | 84.03                           | 0.013                       | 0.056                  | 0.017                    |
| 7        | MLML eastward (A-A) | 14.6         | 4%    | 0.4        | 15.0            | 15.58                          | 15.97                  | 10.03                    | 5.87                 | 71.87                           | 0.159                       | 0.175                  | 0.095                    |

|    |                            |      |        |      |      |       |       |       |       |        |       |       |       |
|----|----------------------------|------|--------|------|------|-------|-------|-------|-------|--------|-------|-------|-------|
| 8  | MLML<br>eastward<br>(B-B)  | 14.6 | 4%     | 0.4  | 15.0 | 30.13 | 22.81 | 19.51 | 8.06  | 139.86 | 0.24  | 0.19  | 0.165 |
| 9  | Leonardini<br>Farm         | 4.3  | 8%     | 0.8  | 5.1  | 1.80  | 3.60  | 1.87  | 2.87  | 29.97  | 0.15  | 0.20  | 0.15  |
| 10 | Treasure<br>island         | 10.0 | 10%    | 1.0  | 11.0 | 4.87  | 7.79  | 4.62  | 4.34  | 43.99  | 0.055 | 0.095 | 0.05  |
| 11 | Rudbanch<br>town canal     | 8.63 | 4.6%   | 0.46 | 9.1  | 20.92 | 16.30 | 22.03 | 15.02 | 232.52 | 0.036 | 0.02  | 0.036 |
| 12 | Balboa<br>Blvd             | 17.0 | 52%    | 4.0  | 21.0 | 20.45 | N.A.  | N.A.  | 9.62  | 109.12 | 0.19  | N.A.  | N.A.  |
| 13 | Wynne<br>Ave               | 11.6 | 33%    | 2.64 | 14.2 | 22.79 | 15.74 | 14.54 | 8.12  | 124.28 | 0.152 | 0.11  | 0.10  |
| 14 | Wufeng<br>Site C (A-<br>A) | 3.5  | 25.5%  | 3.04 | 6.5  | 5.55  | 5.45  | 4.51  | 10.41 | 80.18  | 0.09  | 0.09  | 0.08  |
| 15 | Wufeng<br>Site C (B-<br>B) | 3.5  | 22%    | 1.8  | 5.3  | 4.96  | 5.47  | 4.55  | 9.35  | 80.81  | 0.13  | 0.14  | 0.12  |
| 16 | Wufeng<br>Site C1          | 14.5 | 22%    | 1.8  | 16.3 | 10.59 | 16.36 | 10.65 | 5.60  | 76.79  | 0.105 | 0.17  | 0.105 |
| 17 | Wufeng<br>Site B           | 10   | 22%    | 1.8  | 11.8 | 6.99  | 9.68  | 7.10  | 6.15  | 67.64  | 0.05  | 0.1   | 0.05  |
| 18 | Wufeng<br>Site M           | 11.5 | 12%    | 1.13 | 12.6 | 8.21  | 10.59 | 6.96  | 4.50  | 59.83  | 0.075 | 0.09  | 0.05  |
| 19 | Nantou                     | 9    | 16.45% | 1.43 | 10.4 | 2.87  | 5.89  | 2.98  | 2.68  | 30.59  | 0.057 | 0.12  | 0.06  |

|    |                |       |        |      |      |       |       |       |      |       |       |       |       |
|----|----------------|-------|--------|------|------|-------|-------|-------|------|-------|-------|-------|-------|
|    | Site N         |       |        |      |      |       |       |       |      |       |       |       |       |
| 20 | Hotel Sapanca  | 13.4  | 6.2%   | 0.62 | 14.1 | 5.31  | 4.74  | 4.68  | 3.43 | 35.77 | 0.06  | 0.045 | 0.04  |
| 21 | Police Station | 5     | 24.55% | 1.97 | 7.0  | 2.15  | 3.86  | 2.50  | 2.82 | 29.73 | 0.006 | 0.08  | 0.02  |
| 22 | Soccer Field   | 7     | 34%    | 2.72 | 9.7  | 3.04  | 5.06  | 3.59  | 3.66 | 43.48 | 0.126 | 0.17  | 0.135 |
| 23 | Yalova Harbor  | 14.53 | 20.8%  | 1.72 | 16.3 | 11.28 | 16.99 | 11.40 | 7.76 | 82.03 | 0.08  | 0.16  | 0.083 |

---
