# Supplementary material
Source: publisher figshare collection journal article supplement (https://tandf.figshare.com/articles/dataset/_/12848850)
Supplement: Supplementary file 3 [file 1]

**Table A3.** Summarization of Newmark analysis

| Case No. | Motion name | Idriss and Boulanger<br>-N<br>(m) | Idriss and Boulanger<br>-I<br>(m) | Kramer and Wang-N<br>(m) | Kramer and Wang-I<br>(m) | Olson and Johnson-N<br>(m) | Olson and Johnson-I<br>(m) | Observed<br>(m) |
|----------|-------------|-----------------------------------|-----------------------------------|--------------------------|--------------------------|----------------------------|----------------------------|-----------------|
| 1        | PAS-000     | 1.08                              | 0.98                              | 1.14                     | 1.05                     | 1.21                       | 1.13                       | 1.50            |
|          | PAS-090     | 1.57                              | 1.37                              | 1.66                     | 1.46                     | 1.75                       | 1.55                       |                 |
|          | PDL-120     | 1.86                              | 1.79                              | 1.99                     | 1.91                     | 2.13                       | 2.03                       |                 |
|          | PDL-210     | 0.55                              | 0.53                              | 0.60                     | 0.58                     | 0.66                       | 0.64                       |                 |
| 2        | AGR-003     | 6.54                              | 4.14                              | 2.55                     | 2.06                     | 9.16                       | 5.09                       | 2.10            |
|          | BCR-140     | 5.07                              | 3.86                              | 2.27                     | 2.30                     | 6.65                       | 4.61                       |                 |
|          | BCR-230     | 3.82                              | 3.89                              | 2.23                     | 2.01                     | 4.31                       | 4.71                       |                 |
|          | SHP-270     | 2.59                              | 3.36                              | 1.60                     | 1.70                     | 3.13                       | 3.89                       |                 |
| 3        | BOR000      | 0.43                              | 0.41                              | 0.74                     | 0.70                     | 0.92                       | 0.90                       | 0.75            |
|          | BOR090      | 0.14                              | 0.21                              | 0.37                     | 0.38                     | 0.52                       | 0.49                       |                 |
| 4        | IVW-090     | 0.36                              | 0.37                              | 0.05                     | 0.05                     | 0.40                       | 0.41                       | 0.18            |
|          | WSM-090     | 0.38                              | 0.50                              | 0.06                     | 0.09                     | 0.43                       | 0.55                       |                 |
|          | WSM-180     | 0.47                              | 0.66                              | 0.01                     | 0.17                     | 0.51                       | 0.71                       |                 |
| 5        | GOF-160     | 1.31                              | 1.05                              | 0.07                     | 0.08                     | 1.31                       | 1.05                       | 0.28            |
|          | GOF-250     | 0.96                              | 0.60                              | 0.03                     | 0.03                     | 0.96                       | 0.60                       |                 |
|          | HCH-090     | 3.16                              | 2.32                              | 0.12                     | 0.06                     | 3.16                       | 2.32                       |                 |

|   |         |      |      |      |      |      |      |      |
|---|---------|------|------|------|------|------|------|------|
| 6 | HCH-180 | 3.52 | 3.60 | 0.45 | 0.24 | 3.52 | 3.60 | 0.25 |
|   | HDA-165 | 1.72 | 1.81 | 0.06 | 0.10 | 1.72 | 1.81 |      |
|   | HDA-225 | 1.87 | 1.78 | 0.11 | 0.08 | 1.87 | 1.78 |      |
|   | GOF-160 | 0.79 | 0.66 | 0.15 | 0.16 | 0.61 | 0.55 |      |
|   | GOF-250 | 0.58 | 0.37 | 0.07 | 0.05 | 0.45 | 0.28 |      |
|   | HCH-090 | 1.78 | 1.33 | 0.23 | 0.15 | 1.27 | 0.95 |      |
| 7 | HCH-180 | 2.24 | 2.25 | 0.71 | 0.45 | 1.80 | 1.79 | 0.45 |
|   | HDA-165 | 1.07 | 0.96 | 0.14 | 0.19 | 0.86 | 0.74 |      |
|   | HDA-225 | 1.11 | 1.04 | 0.18 | 0.16 | 0.86 | 0.75 |      |
|   | AND-250 | 0.01 | 0.00 | 0.00 | 0.00 | 0.04 | 0.02 |      |
|   | AND-340 | 0.01 | 0.00 | 0.00 | 0.00 | 0.04 | 0.02 |      |
|   | G02-000 | 0.00 | 0.01 | 0.00 | 0.00 | 0.02 | 0.04 |      |
| 8 | G02-090 | 0.01 | 0.01 | 0.00 | 0.00 | 0.05 | 0.05 | 0.45 |
|   | HCH-090 | 0.02 | 0.00 | 0.02 | 0.00 | 0.08 | 0.02 |      |
|   | HCH-180 | 0.03 | 0.02 | 0.02 | 0.01 | 0.33 | 0.16 |      |
|   | AND-250 | 0.00 | 0.00 | 0.00 | 0.00 | 0.01 | 0.00 |      |
|   | AND-340 | 0.00 | 0.00 | 0.00 | 0.00 | 0.01 | 0.00 |      |
|   | G02-000 | 0.00 | 0.00 | 0.00 | 0.00 | 0.00 | 0.00 |      |
|   | G02-090 | 0.00 | 0.00 | 0.01 | 0.00 | 0.01 | 0.00 |      |
|   | HCH-090 | 0.00 | 0.00 | 0.01 | 0.00 | 0.02 | 0.00 |      |
|   | HCH-180 | 0.00 | 0.00 | 0.01 | 0.01 | 0.03 | 0.02 |      |

|    |                   |      |      |      |      |      |      |      |
|----|-------------------|------|------|------|------|------|------|------|
| 9  | G02-000           | 0.00 | 0.00 | 0.00 | 0.00 | 0.00 | 0.00 | 0.25 |
|    | G02-090           | 0.00 | 0.00 | 0.00 | 0.00 | 0.00 | 0.00 |      |
|    | HCH-090           | 0.00 | 0.00 | 0.00 | 0.00 | 0.00 | 0.00 |      |
|    | HCH-180           | 0.00 | 0.00 | 0.00 | 0.00 | 0.00 | 0.00 |      |
| 10 | TRI-000           | 0.05 | 0.13 | 0.01 | 0.02 | 0.06 | 0.15 | 0.25 |
|    | TRI-090           | 0.09 | 0.18 | 0.00 | 0.05 | 0.11 | 0.21 |      |
| 11 | MANJIL-<br>188040 | 0.13 | 0.13 | 0.39 | 0.39 | 0.13 | 0.13 | 1.00 |
|    | MANJIL-<br>188310 | 0.36 | 0.43 | 1.08 | 1.02 | 0.36 | 0.43 |      |
| 12 | PAR-L             | 0.44 | 0.55 | N.A. | N.A. | N.A. | N.A. | 0.50 |
|    | PAR-T             | 0.87 | 0.76 | N.A. | N.A. | N.A. | N.A. |      |
|    | SYL-090           | 0.47 | 0.15 | N.A. | N.A. | N.A. | N.A. |      |
|    | SYL-360           | 0.40 | 0.23 | N.A. | N.A. | N.A. | N.A. |      |
| 13 | CNP-106           | 0.16 | 0.12 | 0.32 | 0.26 | 0.37 | 0.31 | 0.15 |
|    | CNP-196           | 0.22 | 0.29 | 0.43 | 0.55 | 0.52 | 0.64 |      |
|    | SCE-288           | 0.17 | 0.21 | 0.35 | 0.36 | 0.40 | 0.41 |      |
|    | STC-090           | 0.11 | 0.13 | 0.25 | 0.27 | 0.30 | 0.32 |      |
|    | STC-180           | 0.36 | 0.35 | 0.59 | 0.61 | 0.67 | 0.69 |      |
| 14 | TCU065-000        | 3.63 | 3.62 | 3.63 | 3.62 | 4.28 | 4.24 | 2.05 |
|    | TCU065-090        | 2.07 | 2.05 | 2.07 | 2.05 | 2.59 | 2.54 |      |
| 15 | TCU065-000        | 2.01 | 1.89 | 1.73 | 1.60 | 2.32 | 2.23 | 0.49 |

|    |            |       |       |      |      |      |      |      |
|----|------------|-------|-------|------|------|------|------|------|
|    | TCU065-090 | 0.96  | 0.79  | 0.79 | 0.61 | 1.16 | 1.01 |      |
| 16 | TCU065-000 | 2.89  | 2.85  | 1.11 | 1.01 | 2.89 | 2.85 | 1.20 |
|    | TCU065-090 | 1.53  | 1.46  | 0.49 | 0.25 | 1.53 | 1.46 |      |
| 17 | TCU065-000 | 7.47  | 6.86  | 3.11 | 3.10 | 7.47 | 6.86 | 2.96 |
|    | TCU065-090 | 5.18  | 5.03  | 1.67 | 1.64 | 5.18 | 5.03 |      |
| 18 | TCU065-000 | 4.68  | 4.58  | 3.63 | 3.62 | 7.47 | 6.85 | 1.62 |
|    | TCU065-090 | 2.88  | 2.82  | 2.07 | 2.05 | 5.18 | 5.03 |      |
| 19 | TCU076-000 | 0.86  | 0.58  | 0.22 | 0.11 | 0.81 | 0.53 | 0.25 |
|    | TCU076-090 | 1.23  | 1.16  | 0.28 | 0.26 | 1.12 | 1.06 |      |
| 20 | YPT-060    | 1.92  | 1.33  | 2.81 | 2.43 | 3.23 | 2.98 | 2.00 |
|    | YPT-330    | 0.76  | 0.83  | 1.18 | 1.16 | 1.37 | 1.32 |      |
| 21 | YPT-060    | 11.53 | 10.95 | 1.16 | 0.61 | 6.26 | 5.98 | 2.40 |
|    | YPT-330    | 6.41  | 6.14  | 0.47 | 0.52 | 3.02 | 2.49 |      |
| 22 | YPT-060    | 0.29  | 0.19  | 0.08 | 0.07 | 0.22 | 0.15 | 1.20 |
|    | YPT-330    | 0.12  | 0.16  | 0.01 | 0.04 | 0.09 | 0.12 |      |
| 23 | YPT-060    | 0.41  | 0.23  | 0.02 | 0.02 | 0.35 | 0.21 | 0.30 |
|    | YPT-330    | 0.17  | 0.19  | 0.00 | 0.01 | 0.15 | 0.17 |      |

---
